# Supplementary material for: Protein Kinase B Inactivation Is Associated with Magnolol-Enhanced Therapeutic Efficacy of Sorafenib in Hepatocellular Carcinoma In Vitro and In Vivo
Source: PubMed Central journal article supplement (PMC7017147; doi:10.3390/cancers12010087), 2019-12-30
Supplement: cancers-12-00087-s001.pdf [file cancers-12-00087-s001.pdf]

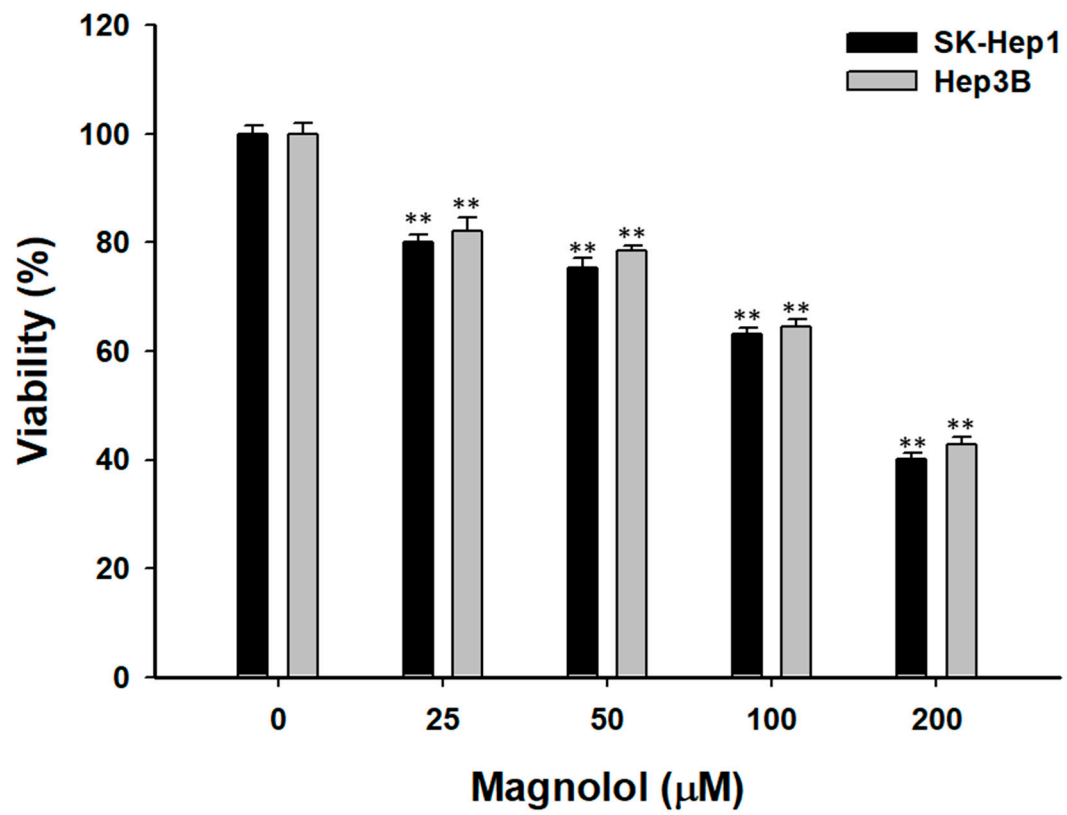

**Figure 1.** Cytotoxicity of SK-Hep1 and Hep3B were increased by 48 h magnolol treatment.

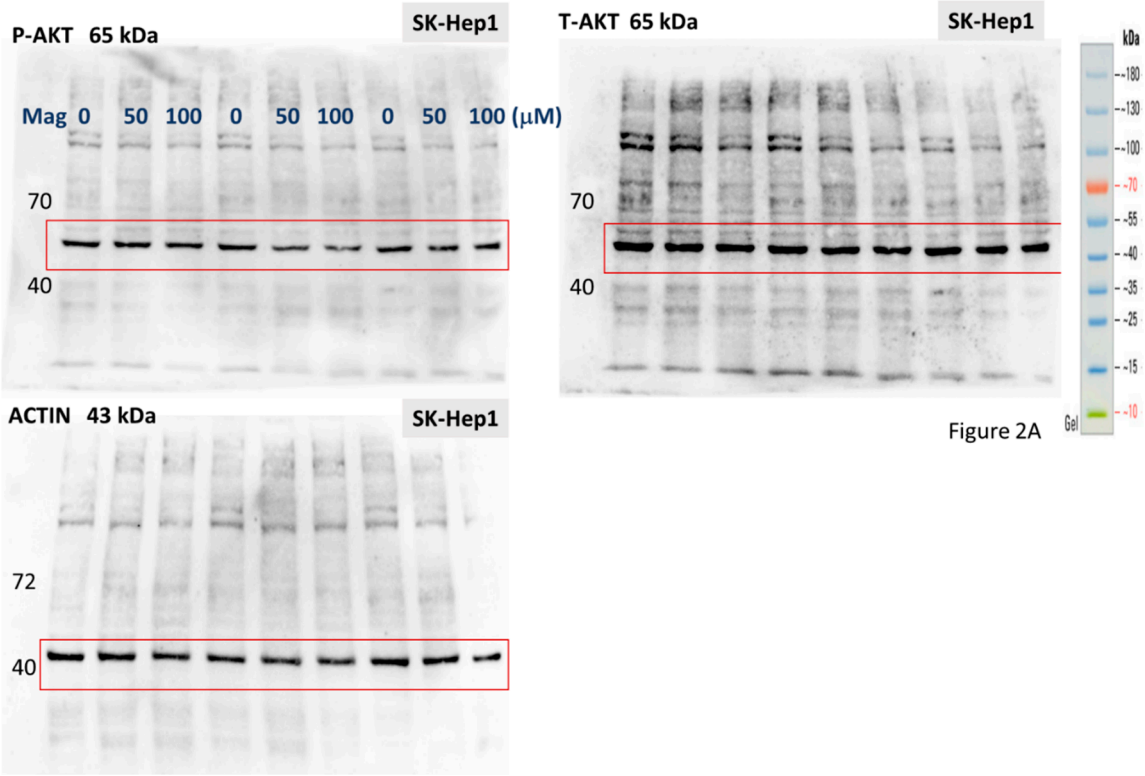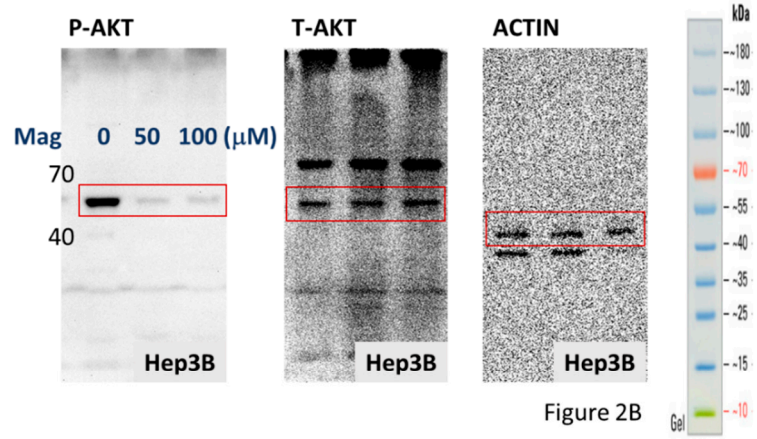

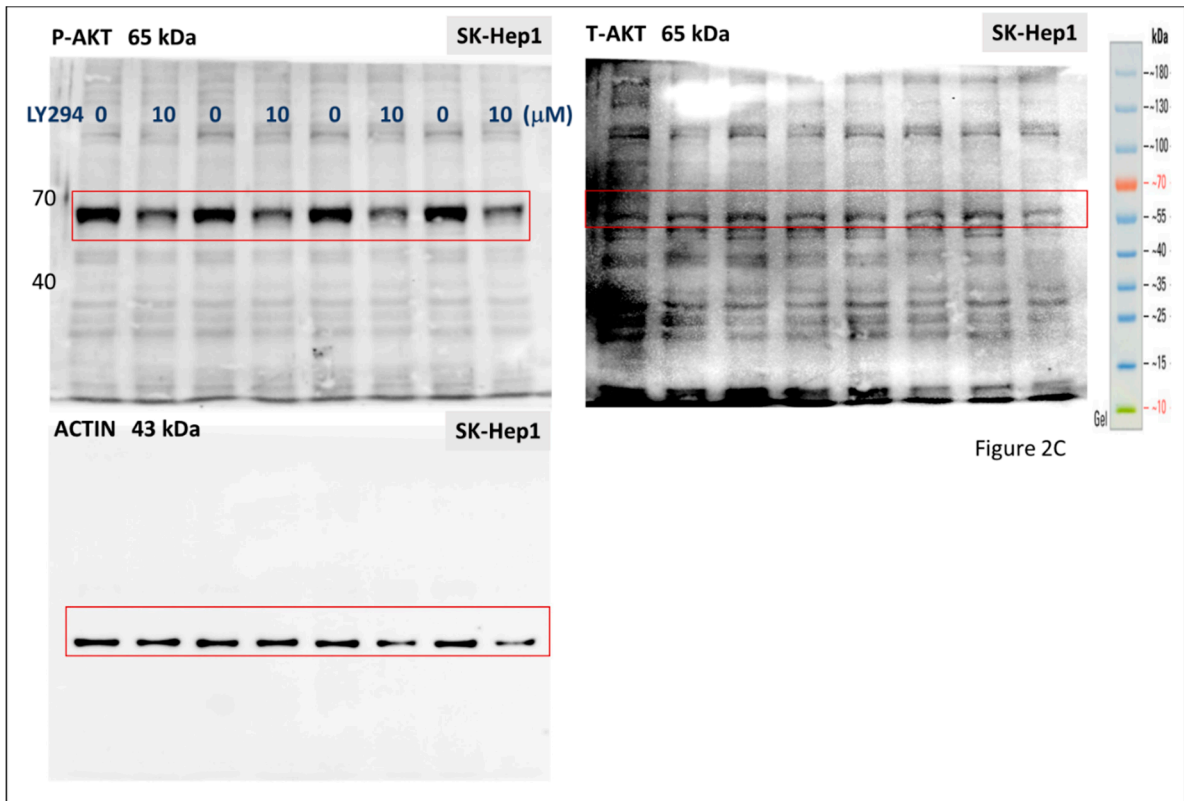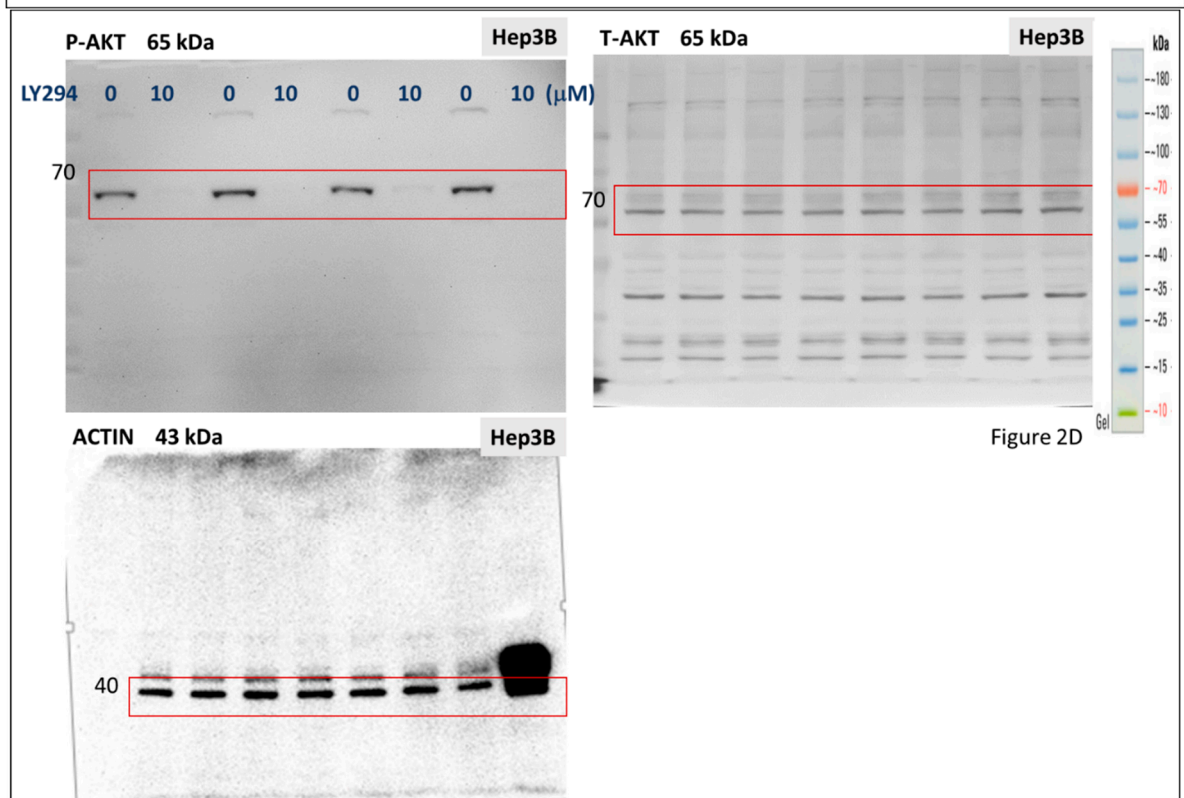

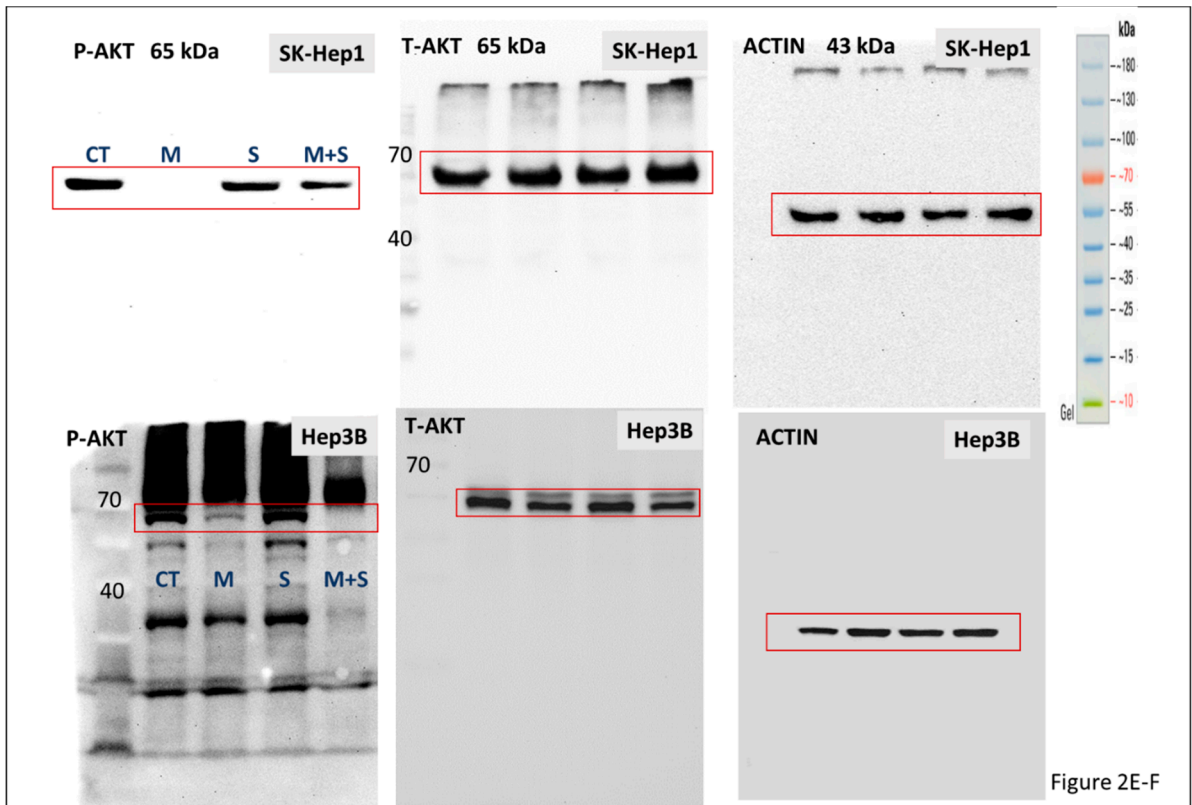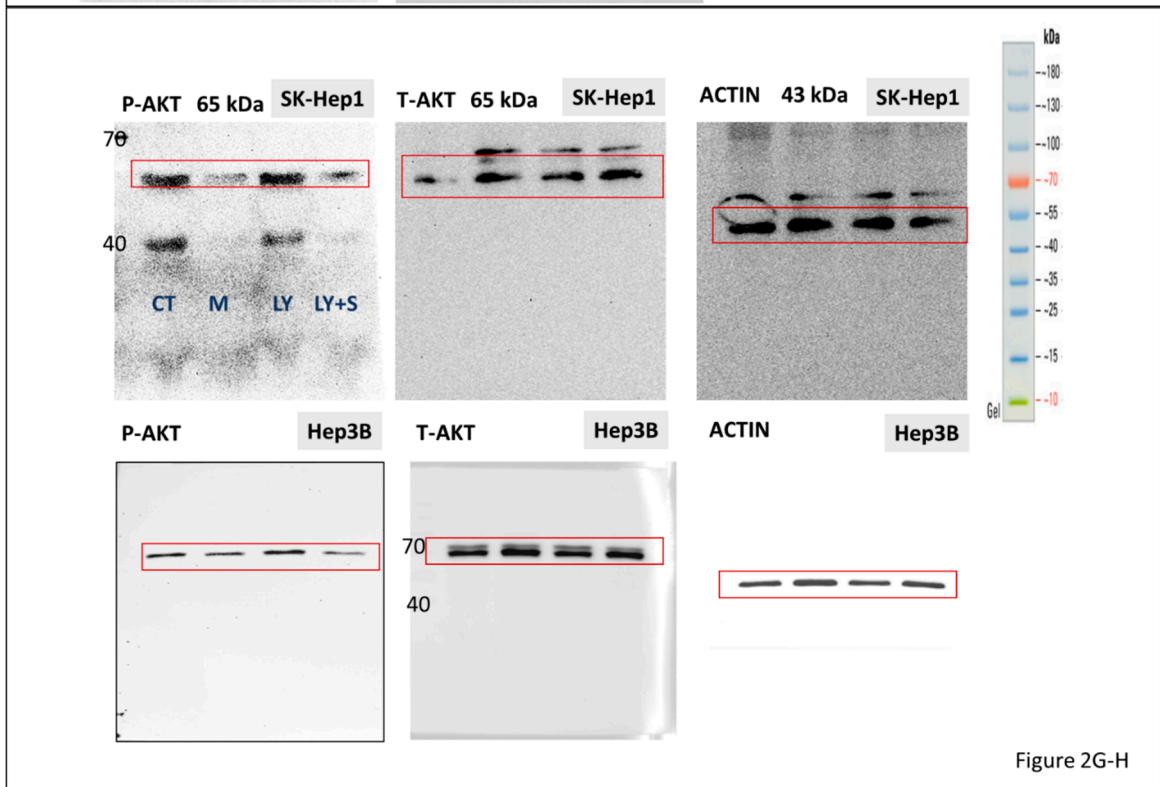



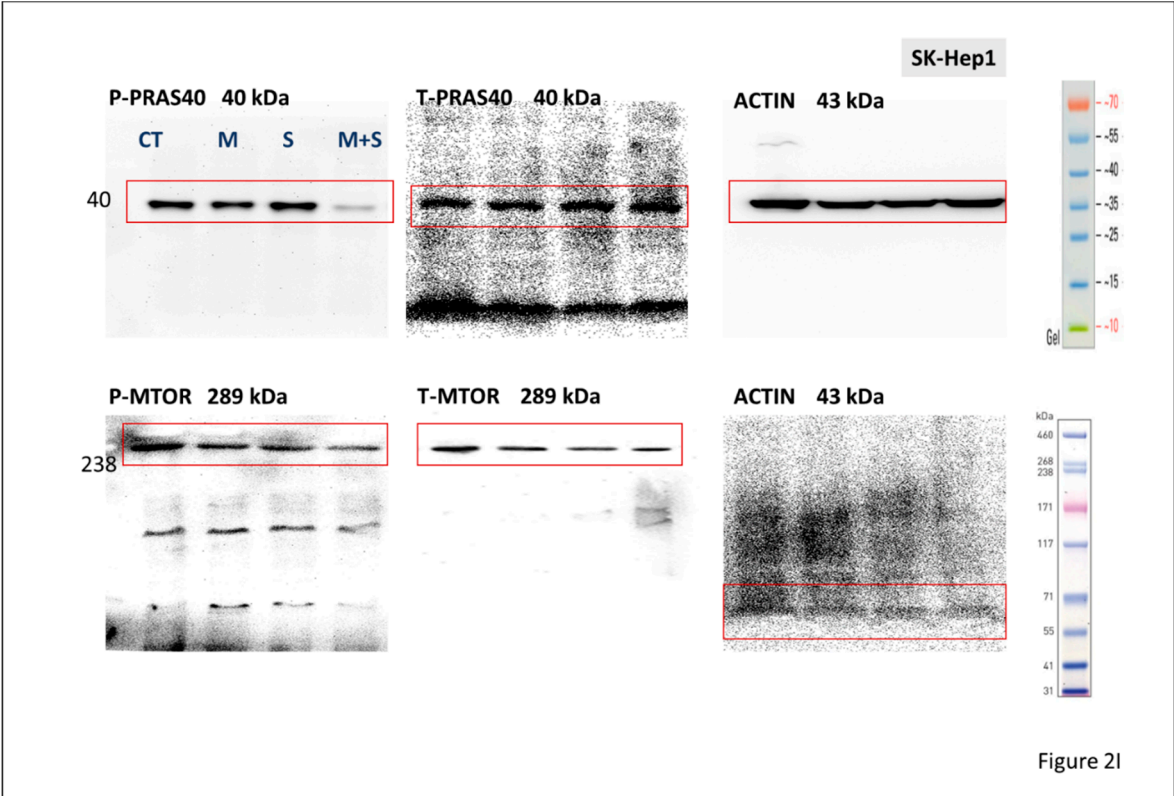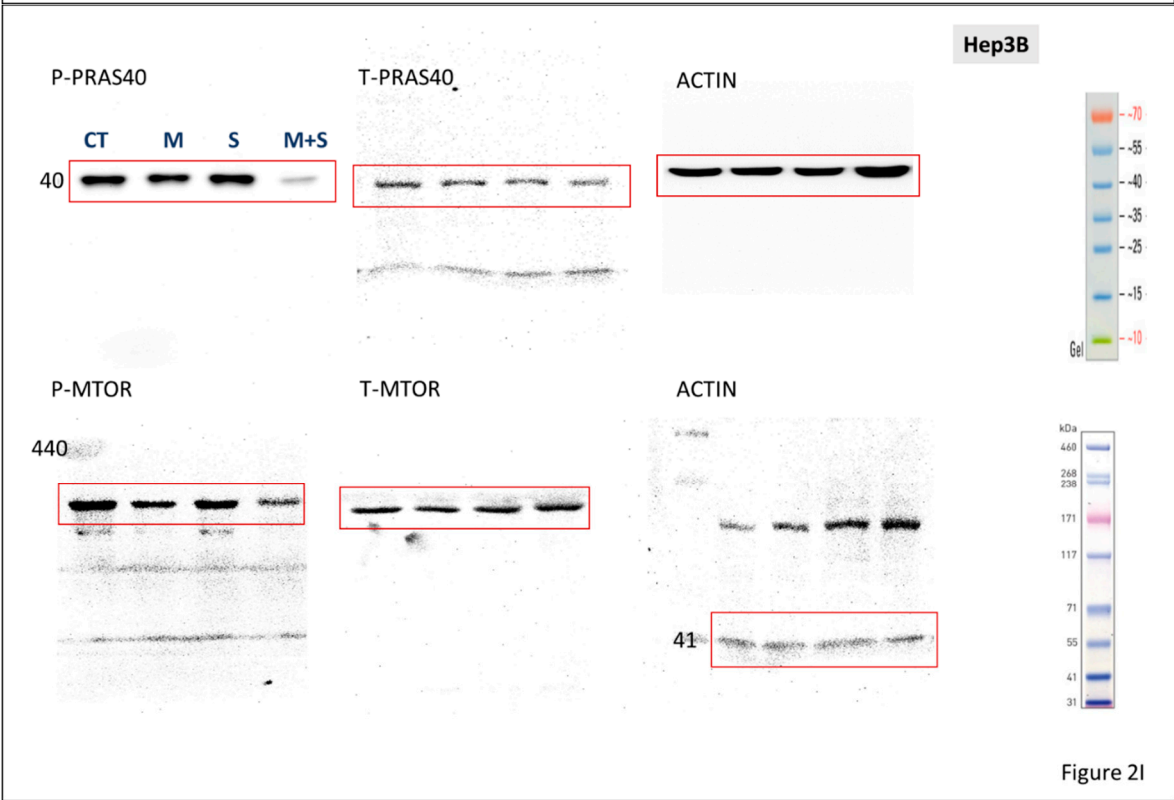

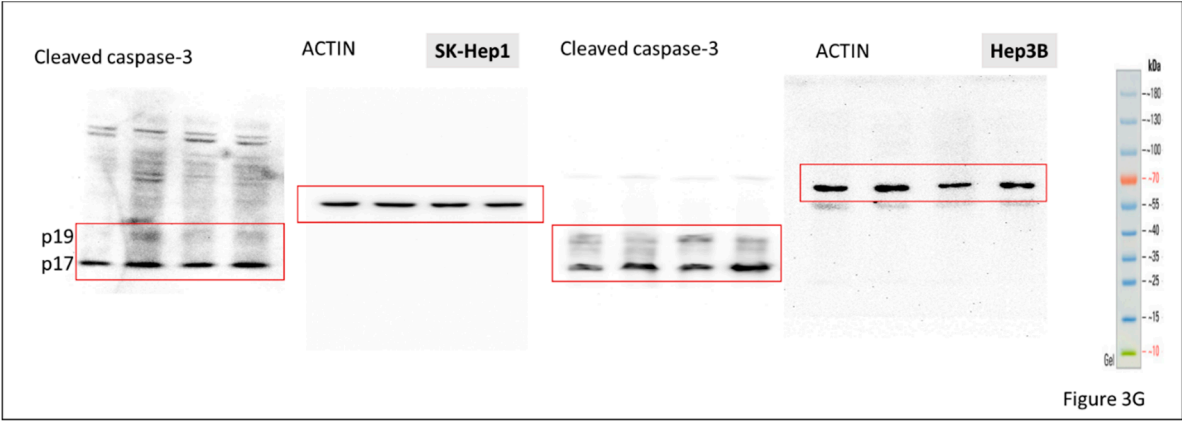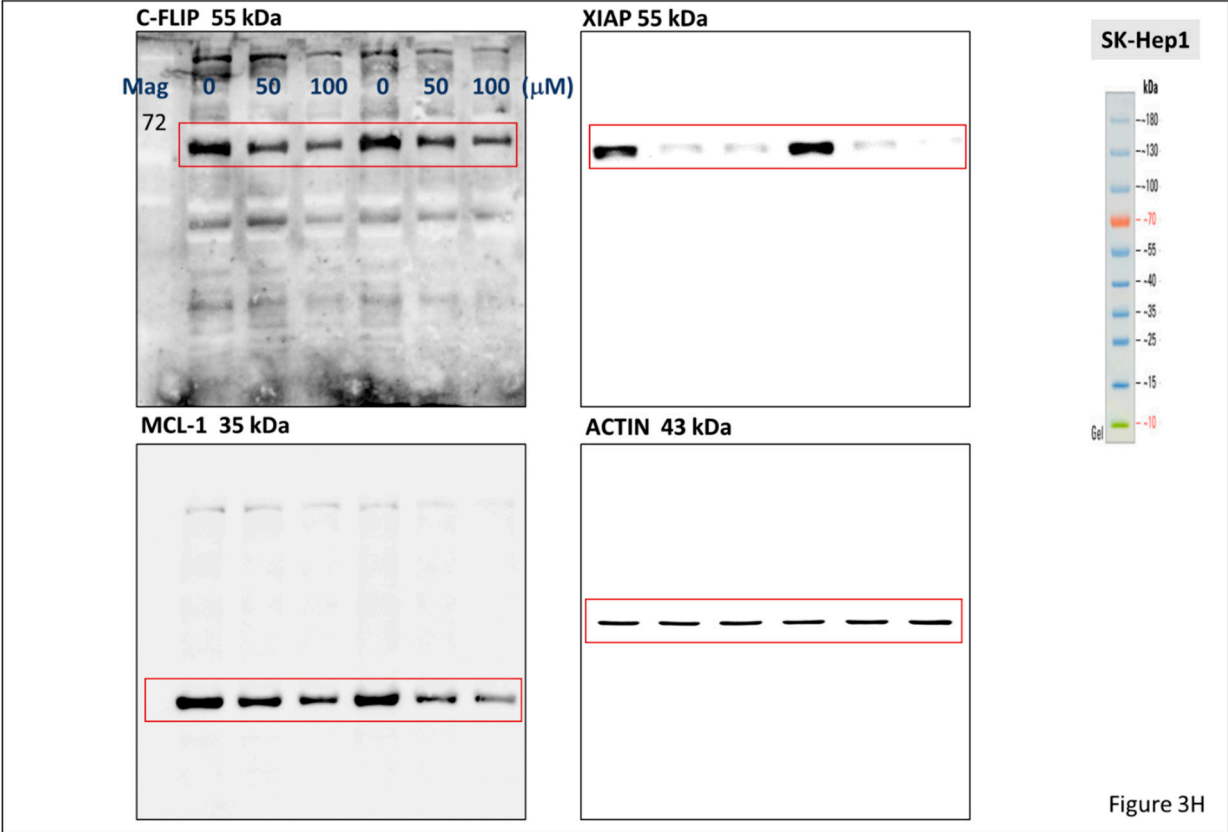

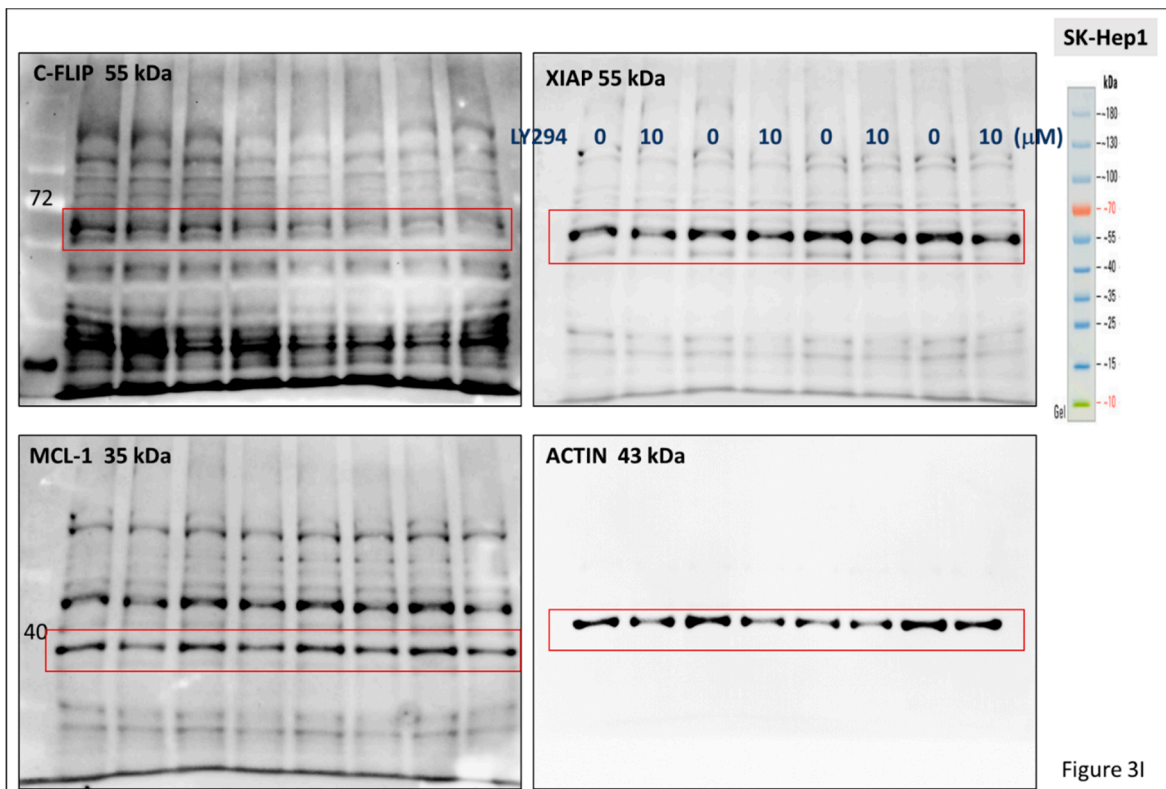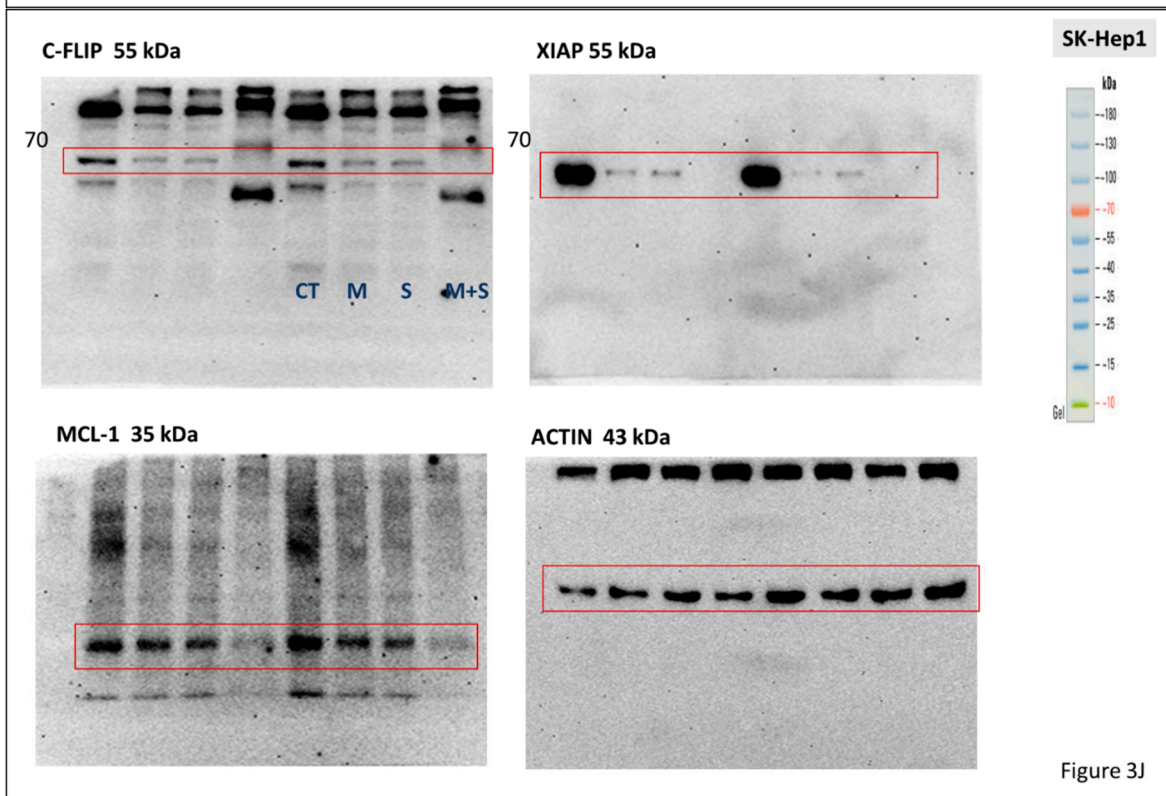

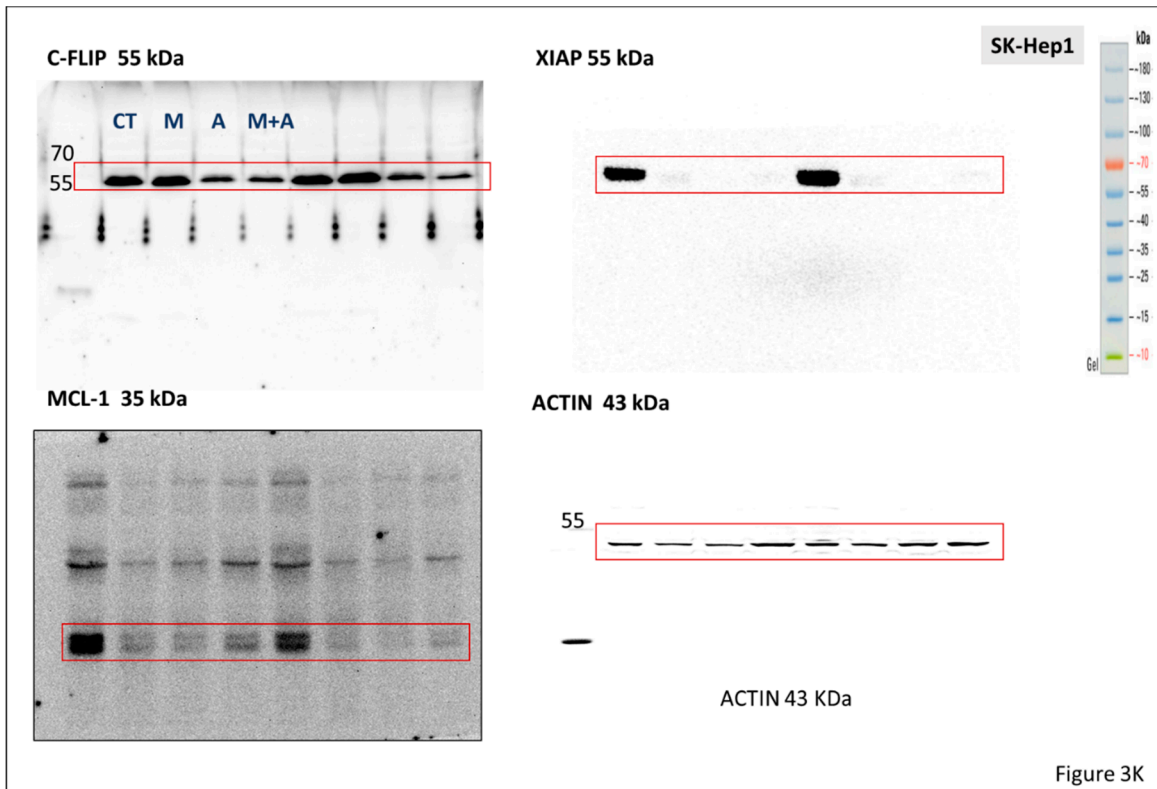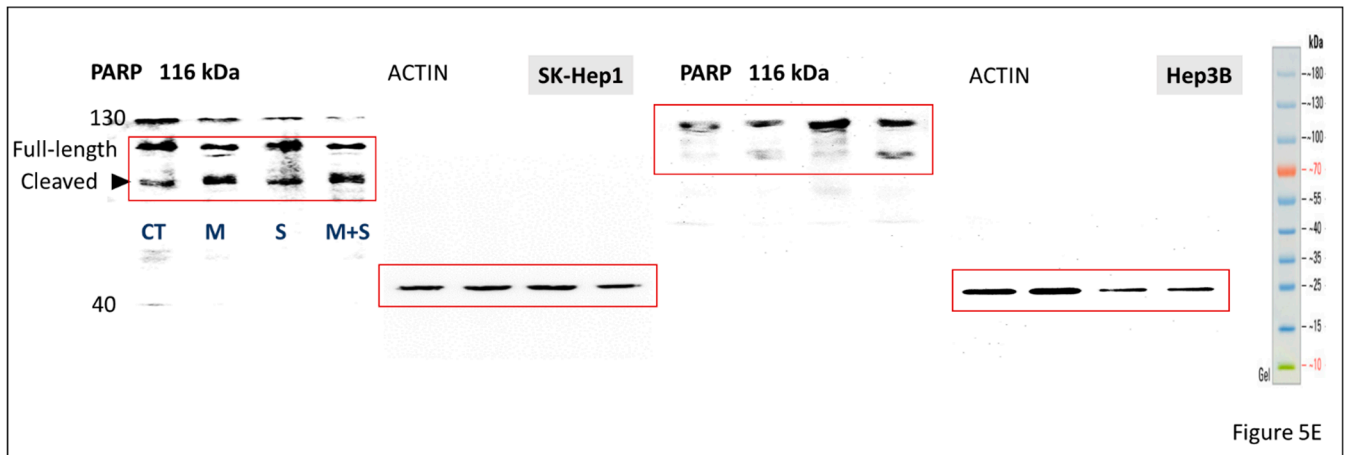

Figure 2. Full Western blot images.
